# Supplementary material for: CD56-targeted in vivo genetic engineering of natural killer cells mediates immunotherapy for acute myeloid leukemia
Source: Royal Society of Chemistry journal article supplement (doi:10.1039/d4nr02692f), 2024-01-01
Supplement: d4nr02692f1.pdf [file d4nr02692f1.pdf]

ARTICLE

## CD56 targeted *in vivo* genetic engineering of Natural Killer cells mediates immunotherapy for acute myeloid leukemia

Avinash Chandra Kushwaha<sup>a</sup>, Boddu Mrunalini<sup>b</sup>, Pankaj Malhotra<sup>c</sup>, Subhasree Roy Choudhury<sup>a,\*</sup>

Received 00th January 20xx,  
Accepted 00th January 20xx

DOI: 10.1039/x0xx00000x

<sup>a</sup>Epigenetics Research Laboratory, Institute of Nano Science and Technology, Knowledge City, Sector 81, SAS Nagar, Punjab 140306, India.

<sup>b</sup>Institute of Nano Science and Technology, Knowledge City, Sector 81, SAS Nagar, Punjab 140306, India.

<sup>c</sup>Department of Clinical Hematology & Medical Oncology, Room No 18, 4th Level, F Block, Nehru Hospital, Postgraduate Institute of Medical Education & Research (PGIMER) Chandigarh 160020, India

\* Corresponding Authors, Email: subhasreerc@inst.ac.in

Electronic Supplementary Information (ESI) available: DOI: 10.1039/x0xx00000x

## ARTICLE

## Supplementary Figures



Fig. S1: Optimization of synthesis of Chitosan nanoparticles and characterization with (A) Dynamic Light Scattering and (B) Zeta Potential analysis.



Fig. S2: Standard curve of intrinsic fluorescence of Tryptophan of IgG. All experiments were performed with  $n=3$ .



Fig. S3: Size distribution analysis based on TEM imaging of CsNPs, pEzH2@CsNPs, CsNPs@CD56, and pEzH2@CsNPs@CD56.



Fig. S4: Flow cytometric Analysis of CD56+NK cells in Peripheral Blood Mononuclear (PBMCs). All experiments were performed with n=3.



Fig. S5: Flow cytometric analysis of CD56+CD3-NK cells in enriched Peripheral Blood Mononuclear (PBMCs). All experiments were performed with n=3.



Fig. S6: (A) Flow cytometric analysis EzH2 expression in sorted CD56+CD3-NK cells; (B) its quantification; and (C) calculation of percentage EzH2 knockdown efficiency after the treatment of different amounts of pEzH2@CsNPs@CD56 infection in the presence of Puromycin. All experiments were performed with n=3.



Fig. S7: Preparation of NK (EzH2-) cells; (A) Flow cytometric analysis of EzH2 expression in sorted CD56+CD3-NK cells and (B) its quantification after infection with pSMP-EzH2- viral particle in the absence and presence of Puromycin. All experiments were performed with n=3.



**Fig. S8:** Green Fluorescent Protein (GFP) expression analysis after infection with AML1-ETO9a viral particles. All experiments were performed with  $n=3$ .



**Fig. S9:** Validation of Xenograft development; GFP Expression analysis in athymic mice PBMCs after 21 days of AML1-ETO9a cells administration. All experiments were performed with  $n=3$ .



**Fig. S10:** Quantification of western blot analysis of spleen tissues from NK (EzH2-) cells-treated and pEzH2-CsNPs@CD56-treated xenograft mice.

## Supplementary tables

| S. No. | Antibody:CsnPs ratio | Percentage antibody conjugation |
|--------|----------------------|---------------------------------|
| 1      | 1:100                | 51.8%                           |
| 2      | 1:500                | 70.9%                           |
| 3      | 1:1000               | 45.1%                           |
| 4      | pEzH2@CsnPs@CD56     | 70.1%                           |

Supplementary table S1: Percentage of Antibody conjugation with CsnPs as calculated based on intrinsic tryptophan fluorescence of IgG.

| S. No. | Primers Name                            | Sequence (5'-3')     |
|--------|-----------------------------------------|----------------------|
| 1      | Fragment A_ <b>(-742/-376)</b> _Forward | TCTTAGGGCGATGTCCTTGC |
| 2      | Fragment A_ <b>(-742/-376)</b> _Reverse | GCTGTGTAAGATATGGCGGG |
| 3      | Fragment B_ <b>(-273/+48)</b> _Forward  | TGCGGTTACGACTGGAAAG  |
| 4      | Fragment B_ <b>(-273/+48)</b> _Reverse  | AGAACGCTGCTCCAGAGAAC |
| 5      | Fragment C_ <b>(+561/+913)</b> _Forward | AAGCATGGGCTGCTTGTGG  |
| 6      | Fragment C_ <b>(+561/+913)</b> _Reverse | GAGAGCTGCCATCACAGTAC |

Supplementary table S2: List of primer for NPM1 promoter region for ChIP-qPCR analysis.
